# Supplementary material for: The road weather model RoadSurf driven by the HARMONIE-Climate regional climate model: evaluation over Finland
Source: Copernicus journal article supplement (doi:10.5194/gmd-2018-330), 2019-02-01
Supplement: Supplementary file 1 [file gmd-2018-330-supplement.pdf]

**Table S1.** The results from the Kruskal–Wallis (K–W) and the Dunn–Sidak (D–S) analysis. Here, SF refers to Southern Finland, WCF to Western and Central Finland, EF to Eastern Finland, NF to Northern Finland, and LAPL to Lapland. The numbers of observations as well as mean ranks are showed in the same order than in which the groups appear in the column of the tested groups. The groups for which the metrics are worse are bolded.

| Metric | Tested groups                                                 | P value (K–W) | Number of observations in the groups | Mean ranks (D–S)                    | Groups differing from each other (D–S)                             |
|--------|---------------------------------------------------------------|---------------|--------------------------------------|-------------------------------------|--------------------------------------------------------------------|
| BIAS   | Region (SF, WCF, EF, NF, LAPL)                                | < 0.001       | 56, 35, 21, 35, 28                   | 57.89, 87.74, 119.67, 111.86, 94.96 | <b>SF &amp; EF</b><br><b>SF &amp; NF</b>                           |
|        | Maintenance class (1, 2, 3, 4)                                | < 0.001       | 49, 63, 42, 21                       | 57.31, 98.95, 103.14, 96.48         | <b>1 &amp; 2</b><br><b>1 &amp; 3</b>                               |
|        | Surrounding characteristics (partly obscured, obscured, open) | > 0.9         | 49, 69, 57                           | 87.61, 88.19, 88.11                 | None                                                               |
| RMSE   | Region (SF, WCF, EF, NF, LAPL)                                | 0.009         | 56, 35, 21, 35, 28                   | 77.34, 75.77, 87.81, 95.20, 115.75  | <b>SF &amp; LAPL</b>                                               |
|        | Maintenance class (1, 2, 3, 4)                                | 0.007         | 49, 63, 42, 21                       | 83.43, 77.16, 93.81, 119.57         | <b>2 &amp; 4</b>                                                   |
|        | Surrounding characteristics (partly obscured, obscured, open) | 0.16          | 49, 69, 57                           | 77.27, 89, 96.02                    | None                                                               |
| R      | Region (SF, WCF, EF, NF, LAPL)                                | < 0.001       | 56, 35, 21, 35, 28                   | 109.75, 86.60, 111.43, 68.69, 52.82 | <b>SF &amp; NF</b><br><b>SF &amp; LAPL</b><br><b>EF &amp; LAPL</b> |
|        | Maintenance class (1, 2, 3, 4)                                | < 0.001       | 49, 63, 42, 21                       | 104.76, 90.29, 79.34, 79            | <b>1 &amp; 4</b><br><b>2 &amp; 4</b>                               |
|        | Surrounding characteristics (partly obscured, obscured, open) | 0.002         | 49, 69, 57                           | 108.73, 76.09, 84.60                | Partly obscured & <b>obscured</b>                                  |
