# Supplementary material for: The road weather model RoadSurf driven by the HARMONIE-Climate regional climate model: evaluation over Finland
Source: Copernicus journal article supplement (doi:10.5194/gmd-2018-330), 2019-02-01
Supplement: Supplementary file [file Author_response_reviewer_1.pdf › Review_1/Author_response_reviewer_1.pdf]

**Author response for the reviewer #1 regarding the manuscript *"The road weather model RoadSurf driven by the HARMONIE-Climate regional climate model: evaluation over Finland"***

We thank the reviewer #1 for the comments and suggestions (in blue). Please find our detailed point-by-point responses below (in black).

We have made changes in the manuscript, and the changes are visualized in the attached file "gmd-2018-330\_version2". The pages and line numbers as well as the reference numbers for figures used in this response correspond to the ones used in the attached documents.

Anonymous Referee #1

GENERAL COMMENTS:

This article presents an evaluation study across Finland of a 13-year long record of road surface temperatures and road ice, snow, and water storage parameters obtained with a road surface weather model driven by output from a regional climate model operated at 12.5 km resolution. The RCM is in turn forced at its lateral boundaries by atmospheric information from the ERA-Interim re-analysis. The emphasis of the analysis is on the performance of the road surface model compared with observations obtained at 25 road weather stations of which 11 were also equipped with optical sensors to establish the prevailing condition of the road surface.

Overall, the paper is coherently written, but in my opinion the scope is too much from the perspective of an NWP. The entire analysis assumes as if the modelling chain can be one-to-one compared with observations and a statistical machinery is applied resulting in skill scores which one usually sees in assessing the forecast performance of a prediction model. This approach does not match with the purpose of the study to evaluate a model system when operated in climate mode but still using observations (ERA-Interim) to constrain the large-scale model circulation to the observed synoptic-scale structure.

We thank the reviewer for the careful and throughout evaluation of our manuscript. We also apologize that we did not emphasize enough the reasoning behind our study that is to assess if RoadSurf can adequately capture the road weather conditions occurred in the current climate when forced with a reanalysis-driven regional climate model (RCM) HARMONIE-Climate (HCLIM). This is the first time such a modeling chain is evaluated and, therefore, we believe that forcing HCLIM with the ERA-Interim reanalysis product suits well this purpose instead of forcing HCLIM directly with global circulation models (GCMs). When forcing HCLIM by a reanalysis product, the large-scale model circulation is constrained by the observed synoptic-scale, as also mentioned by the reviewer. For example, Kotlarski et al. (2014) state that it is a standard procedure to carry out evaluation experiments using the (close to) perfect boundary settings in RCMs, which means using reanalysis product, such as ERA-Interim, to force the regional climate model in the lateral boundaries as it is done in our study. We have therefore clarified the goals of our study in the introduction (see P2–3 L58–64).

Regarding the NWP perspective, it is true that we have used daily data in the analysis of RoadSurf. On the other hand, the regional climate model HCLIM has been evaluated using standard metrics, mean seasonal biases for temperature and mean seasonal relative biases for precipitation using monthly values over 13 years. The daily time scale was chosen for the RoadSurf evaluation because the daily (and even hourly)

temporal scales are most relevant when studying road weather as also mentioned in the manuscript.

However, it is good to note that we have calculated the metrics using daily data obtained for 13 years separately for each month and taken multi-year monthly means of the daily values. This means that for example the mean biases for road surface temperature and mean daily fractions of road surface classes will be the same regardless the time scale in question (e.g. for the biases, the means of the monthly means of daily mean biases and the means of the monthly mean biases are the same; please see Equation 1 below). To better account for the fact that RoadSurf was forced by an RCM, we have performed a part of the analysis (sections 3.2.1, 3.2.3 and 3.2.4) at a (multi-year) monthly scale. The main conclusions stay the same due to the nature of calculating means as explained by the following equation (example for one month):

$$\frac{\sum_{d=1}^{30} \left( \frac{\sum_{h=1}^{24} M_h - O_h}{24} \right)_d}{30} = \frac{\sum_{d=1}^{30} \left( \frac{\sum_{h=1}^{24} M_h}{24} \right)_d}{30} - \frac{\sum_{d=1}^{30} \left( \frac{\sum_{h=1}^{24} O_h}{24} \right)_d}{30} \quad (1)$$

where  $d$  refers to day,  $h$  to hour,  $M_h$  to  $h$ th model value, and  $O_h$  to  $h$ th observed value.

The next step, also mentioned by the authors, will be to run the RCM-RoadSurf modelling system driven by GCM output resulting from transient multi-annual simulation under prescribed emission scenarios. The biases then found will presumably be much larger than seen in this evaluation study, and any performance rating as if it were a prediction model will be deemed meaningless. The primary reason for that is huge biases in circulation and regime statistics in the GCM drivers compared to ERA-Interim. So, the authors can better focus on the role of circulation and regime drivers on the performance of their modelling chain, than focus on skill scores like RMSE and Pearson's correlation coefficients. Eventually, they want to draw credible conclusions how climate change information at the large scale will propagate through their RCM to the RoadSurf model.

We agree with the referee that the performance of RoadSurf that is forced by ERA-Interim-driven HCLIM does not mean that we will obtain exactly the same results when HCLIM is forced by GCMs. However, we think the ERA-Interim evaluation is crucial before continuing to use this method further. If RoadSurf would not perform adequately when the input data is coming from an RCM forced by a reanalysis product (i.e. with perfect boundary settings), we see that it would not be appropriate to analyze the effects of climate change on road weather with this method. In our opinion, the evaluation of RoadSurf that is forced by a GCM-driven HCLIM would be a subject of its own study. However, this aspect will be looked at when RoadSurf's inputs are retrieved from a GCM-driven HCLIM. Please see also our comments above (the first paragraph of our response).

As road surface temperature is the main output parameter in RoadSurf, we have, however, added an analysis of the relationships between the road surface temperature biases and the biases in the input parameters of RoadSurf that are retrieved from HCLIM (please see section 3.2.1 starting from P12 L351).

In addition I would argue that the way the experiment has been set up makes it very difficult to conclude how the shortcomings in performance can be attributed to the model components that are used. Several times the authors mention that an issue might be related either to the warm and/or wet bias in their RCM or to features in the RoadSurf model. In that respect, I am wondering why the authors have not carried out a bias adjustment to HCLIM-ALARO temperature and precipitation which serve as forcings to the

RoadSurf model. Such an additional experiment would have a twofold benefit: a) to disentangle the bias in HCLIM from issues in RoadSurf, and b) to obtain a measure to what extent the biases in HCLIM affect the performance of RoadSurf. The latter would be very helpful in the analysis and interpretation of future GCM-driven experiments.

We agree with the referee that bias-correction could be helpful in distinguishing the biases caused by the input retrieved from HCLIM and by RoadSurf itself. However, we would like to remind that the purpose of this study was to evaluate the whole modeling chain (i.e., the model biases in RoadSurf when forced by reanalysis-driven HCLIM) and to show that RoadSurf can reliably capture occurred road weather conditions in Finland when driven by an RCM.

We believe that carrying out bias-correction is therefore not in the scope of our study and would require a considerable amount of work, which might not be feasible in the context of this paper. We also see that bias-correction might not be very beneficial as the distributions of e.g. modeled daily minimum, mean, and maximum temperatures as well as precipitation are already relatively close to observations (See Figs. S2 and S3 in the updated manuscript). In addition, it might not always be very straightforward to use bias-correction, such as quantile mapping (that was suggested by the reviewer), for the future simulations as the error correction values might not be stationary (see e.g. Switanek et al., 2017). Moreover, e.g. Maraun et al. (2017) state that if regional feedbacks are not properly taken into account, bias-correction methods, such as quantile mapping, might lead to implausible regional climate change signals. Another problem can be the physical inconsistencies in the bias-corrected data (Schoetter et al., 2012).

But as said earlier, we have now added an analysis of the relationships between the road surface temperature biases and the biases in the input parameters at the road weather stations. Based on this analysis, the road surface temperature bias seems to be mainly explained by the variability of the air temperature bias (section 3.2.1 starting from P12 L351 ) as speculated in the first version of the manuscript.

#### MAJOR COMMENTS:

1) I would strongly suggest to focus on the Finland area from the beginning. The discussion of the HCLIM-ALARO model performance for the whole of the Fenno-Scandian domain is distracting. There are always huge issues in the mountainous areas in Norway, for any RCM, and also in E-OBS, but they are not relevant for this study. Focus on Finland in Figs 3 and 5.

Thank you for the suggestion. In the updated manuscript, we show results only over Finland (please see Figs. 3 and 6). Also, the discussion is now adjusted to cover only Finland for section "3.1 Evaluation of HCLIM38-ALARO".

2) Do not only examine the bias in the monthly mean temperature, but also at a number of percentiles (e.g. P5,25,75,95). The diurnal amplitude in model temperature compared to observations is relevant here as well.

The temperature percentiles (P5, P22, P75 & P95) have been added in the Supplement (Fig. S5) and are discussed in the new section 3.1.2. Moreover, we have included figures of the biases in daily minimum and maximum temperatures to account for the diurnal cycle (Fig. 5 in the new section 3.1.2).

It is still good to note that the purpose of our paper is not to evaluate very thoroughly the performance of HCLIM, but rather focus on the performance of RoadSurf.

3) Similarly for precipitation. In addition to mean precipitation look at wet-day frequency (threshold 0.3 or 1.0 mm/day), and perhaps some exceedance percentiles. It provides much more insight than an RMSE score.

Initially, we did not use RMSE scores for precipitation, but showed mean relative seasonal precipitation biases (Figs. 6 and 7). We have included a new figure on the wet-day frequency (Fig. S6) and added a discussion regarding this figure in section 3.1.3.

As said above, it is good to keep in mind that the purpose of our paper is not to evaluate very thoroughly the performance of HCLIM, but rather focus on the performance of RoadSurf.

4) Can there be said anything about the accuracy of the RCM inputs other than near-surface temperature and precipitation that are used to drive the RoadSurf model.

We have now added a brief evaluation of other input parameters (relative humidity, wind speed, as well as shortwave and longwave radiation) by comparing HCLIM model results and ERA5 reanalysis product (please see section 3.1.4). In addition, we have briefly evaluated the modeled total cloud fraction.

5) As mentioned in the general comments it would be useful to apply a bias-adjustment on daily mean temperature and precipitation, also frequency of occurrence, to bring the HCLIM-ALARO temperature (e.g. quantile-quantile) and precipitation forcing in the same “statistical” ballpark as the observations.

Please see our response above (the last paragraph of general comments).

6) As the RCM is operated at 12.5km resolution there should be reference to the efforts within EuroCordex in conducting evaluation (ERA-Interim driven) and transient (GCM driven) experiments at 12.5 km resolution across Europe with a variety of RCMs. For the evaluation study you best cite Kotlarski et al. (2014; doi:10.5194/gmd-7-1297-2014).

Thank you for pointing out this relevant reference. The EURO-CORDEX initiative has been mentioned in the introduction as well as in the discussion of the results obtained with HCLIM.

The following phrases were added:

*“Although high-resolution climate projections for Europe are currently available through the international climate downscaling initiative EURO-CORDEX that provides RCM data at 50 km (EUR-44) and 12.5 km (EUR-11) resolution (Jacob et al., 2014), the EURO-CORDEX dataset does not publicly include reanalysis-driven RCM simulations at very high temporal resolutions, such as 1-hourly.” (P3 L64–67)*

*“On the other hand, the HCLIM results for mean seasonal  $T_{air}$  were in agreement with EURO-CORDEX RCMs that were run at 12.5 km grid resolution. For instance, Kotlarski et al. (2014) showed that some of the ERA-Interim-driven EURO-CORDEX RCMs had a warm (cold) bias especially over the northern parts of Finland during the winter (summer).” (P8 L230–233)*

*“The results obtained for HCLIM showed similar magnitude and spatial patterns of the precipitation biases compared to other EURO-CORDEX RCMs that are mostly overestimating seasonal precipitation over Finland during the winter and summer as shown by Kotlarski et al. (2014).” (P9 L281–284)*

*“Overall, the HCLIM results were found to be in line with other EURO-CORDEX RCMs.” (P19 L586–587)*

7) Section 3.2.1 (“Road surface temperature”), after line 240 bothers me most. Why are all discrepancies blamed on the bias in temperature forcing, and not on potential issues with

downwelling radiation, in particular biases in downwelling long wave radiation due to biases in cloud amount or cloud base.

We have now evaluated the biases in the downwelling radiation (both shortwave and longwave). The variability in the biases of downwelling longwave radiation seems to play a small role in explaining the variability of road surface temperature biases. However, the biases in the air temperature have a much larger impact (please see section 3.2.1 starting from P11 L342) as speculated in the first version of the manuscript.

The following phrases were added:

*“The analysis shown in Fig. 10 revealed that the variability of the monthly biases in  $T_{air}$  explained on average 57 % (range 19–84 % in October–April) of the variability of the monthly biases in  $T_{road}$  while the  $LW_d$  biases explained on average 16 % (range 2–34 % in October–March). Furthermore, the variability in  $SW_d$  was found to explain a small amount (4 %) of the variability in  $T_{road}$  during April.”* (P12 L351–357)

8) Page 9, L260-266. The authors argue that the better skill obtained with the forcing from the NWP compared to this study can be ascribed to the higher resolution at which the NWP is operated. I tend to disagree on that, in my opinion the use of data-assimilation when operating in NWP-mode will keep the model atmospheric state across the Finland region much closer to the observed state.

Thank you for pointing this out. However, we have compared the results only to the ones that are obtained without any data assimilation. This has been clarified in the text as follows:

*“For example, Karsisto et al. (2016) found that the biases in the simulated  $T_{road}$  varied between  $-1$  and  $1$  °C (mostly  $\pm 2$  °C in our study) at 20 stations in Finland during October and December 2013 when RoadSurf was driven by a high-resolution NWP version of HARMONIE (cy36h1.4) with a grid resolution of 2.5 km without any data assimilation. However, it is good to note that the results obtained in our study and by Karsisto et al. (2016) are not directly comparable since in their study RoadSurf was initialized using road weather station measurements for 48 hours and only the first forecasted hour was analyzed.”* (P13 L391–397).

9) The statistical methods used in sections 3.2.2. are not suitable for evaluation purposes, they belong to the realm of NWP verification. I advise to take this section out or move it to the supplement.

This old section 3.2.2 has been removed, and some parts of the discussion on the model performance from this section have been moved to section 3.2.1 (starting from P12 L381).

10) The same applies to section 3.2.5 although I find the message (i.e. over-representing of storage of ice, under-representation of storage of water) quite useful. So I would advise to move the technical method to the supplement but keep the message in the main body of the manuscript.

The technical method has been moved to the supplement, and only the results from POD-FAR analysis are kept (see section 3.2.4). In addition, we have added a figure and discussion on the multi-year sums of the occurrence of the storages for both model and observations thus avoiding a day-to-day comparison (Fig. S7; please see section 3.2.4 starting from P17 L527).



## OTHER COMMENTS:

1) It must be mentioned in the abstract that the HCLIM-ALARO simulation is driven by ERA-Interim

This is now mentioned in the abstract as follows:

*"RoadSurf was driven by meteorological input data from the cycle 38 of the high-resolution regional climate model (RCM) HARMONIE-Climate (HCLIM38) with ALARO physics (HCLIM38-ALARO) and ERA-Interim forcing in the lateral boundaries."* (P1 L10–11).

2) Abstract, L 13: remove "precisely"

Removed (P1 L15).

3) Abstract, L 14, 18: replace "lack" by "absence" According to the text in Line 99 "the model does not take into account wintertime road maintenance operations ...". From that line I conclude that there is no maintenance at all in the model. "Lack" may imply there is still some maintenance left. Please, adjust everywhere in the text, if needed.

Corrected (P1 L22, P4 L119, P16 L500, P18 L552, P18 L556, & P19 L607).

4) Abstract, L 17: remove "simulated", it is already implied by "warm bias".

Removed (P1 L19).

5) Introduction, L 24: "climate and weather information" → "weather and climate information".

Corrected (P1 L28).

6) Introduction, L34: "Finish temperatures ..." → " Finish temperature records ..."

Corrected as "Finnish temperature records" (P2 L38).

7) Introduction, L42: replace "reliable" by "plausible" or "credible". It is not a prediction.

Changed as "credible" (P2 L46)

8) Introduction, L65: "13 year long simulations" → "13-year long simulations".

Corrected (P3 L78).

9) Page 3, L85-88: mention the source of the sea-surface boundary conditions (SST and sea-ice extent (probably also ERA-Interim)

Yes, these parameters (SST and sea-ice concentration) are taken from ERA-Interim. This information has been added in the text as follows:

*"The sea-surface (sea-surface temperature and sea-ice concentration) and lateral boundary conditions of HCLIM38-ALARO were taken from ERA-Interim reanalysis (Dee et al., 2011) every 6 hours."* (P4 L102–104).

10) Page 3, L92: "transfer in the ground ..." → "transfer into the ground ..."

Corrected (P4 L110).

11) Page 4, L95: ".. the elevation is taken into account ..." The elevation of what or with respect to what?

By elevation, we mean topography in general as RoadSurf otherwise assumes a flat surface. Modified as follows:

"However, topography in general is taken into account implicitly through the input data."  
(P4 L114).

12) Page 4, L107: "... we did not include any forecast periods". Suggest to add the phrase "implying that no in-situ observations are used to initialize and force RoadSurf."

This has been added in the text (P4 L125–126).

13) Page 4, L119: Mention the version of the E-OBS dataset.

In the first version of the manuscript, we used the E-OBS version 17.0. In the updated manuscript, we have utilized the minimum and maximum temperatures provided by E-OBS version 19.0e (as suggested in the reviewer comment 14). Thus, we redid the analysis of mean temperatures and precipitation using the new ensemble version 19.0e. This information is now added in the text (P5 L140). In addition, we updated all the figures where E-OBS data was used (Figs. 3–4 & 6–7).

14) Page 4, L120: In addition to daily mean temperature, E-OBS also contains daily minimum/maximum temperature. Why not using these parameters for evaluation?

The minimum and maximum temperatures provided by the E-OBS version 19.0e have now been employed in the evaluation of HCLIM38-ALARO (please see section 3.1.2).

15) Page 4, L 122: remove "some"

Removed (P5 L146).

16) Page 5, L 127: remove "some"

Removed (P5 L151).

17) Page 6, L 180: the phrase "... such as from the possible biases in the input parameters ERA-Interim ..." is confusing. Do you mean that land-surface information from ERA-Interim is used in forcing HCLIM-ALARO, or does this statement refer to the lateral/sea-surface boundary conditions specified from ERA-Interim?

ERA-Interim's SST and sea-ice concentration are used to force HCLIM. If these input parameters from ERA-Interim are biased, it might affect the performance of HCLIM. This has been clarified in the text. This matter would need further evaluation, which is unfortunately not in the scope of this study.

The following phrases were added:

*"A prognostic lake model was included in the model version used in this study, and thus the warm bias might have stemmed from other reasons, such as from SURFEX's own features or the possible biases in ERA-Interim's sea-surface temperatures or sea-ice concentrations that are used to force the sea-surface in HCLIM."* (P8 L225–230)

18) Page 7, L197: "Similarly than in ..." → "Similar to ..."

Corrected (P9 L264).

19) Page 8, L227: "... during different months" → "... for different months"

Corrected (P11 L333).

20) Page 9, L268: "earlier" → "before"

This part of the old section 3.2.2 is removed, and therefore this correction was not made.

21) Page 10, L296: "further" → "hence"

Corrected (P13 L385).

22) Page 10, L300-311: “the stations” → “stations” (about 11x)

This part of the old section 3.2.2 is removed, and therefore this correction was not made.

23) Page 10, L307: “It could be expected ...” → “It might be expected ...”

This part of the old section 3.2.2 is removed, and therefore this correction was not made.

24) Page 10, L316: “between the different stations” → “between stations”

This part of the old section 3.2.2 is removed, and therefore this correction was not made.

25) Page 10, L317: “hypothesized” → “speculated”

This part of the old section 3.2.2 is removed, and therefore this correction was not made.

26) Page 11, L343: “class occurred within a month” → “class occurring within a month”

Corrected (P15 L482).

27) Page 11, section 3.2.4 and Fig. 9 Perhaps you could briefly repeat that the road surface classes in the observations and the model do not entirely match.

This information has been repeated as follows:

*“It is good to remember that the observed and modeled road surface classes might not fully match as they are defined differently.” (P16 L484–485).*

*“The definitions of road surface classes differ slightly for observations and model (e.g. the partly icy class is included only in the model).” (Fig. 12; P35 L1088–1089)*

28) Page 12, L356-357: rephrase last part of sentence as “i.e., the tendency of the model to underestimate frost and to overestimate ice with the same magnitude.”

Rephrased as suggested (P16 L498–499).

29) Page 12, L360-361: “where much less maintenance” → “where maintenance” and “is performed compared to ...” → “is performed far less frequently compared to ...”

Corrected (P16 L502–503).

30) Page, 12, L 362: “In real life,” → “In reality”

Corrected (P16 L504).

31) Page, 12, L 365-367: That is precisely the problem, because the bias in forcing temperature has not been adjusted the distinction between those two error sources cannot be made

We are discussing the possible reasons for the bias, so we would not call this a problem but rather a speculation. Most likely, both factors are contributing to the errors.

32) Page, 12, L 375: No threshold used? Just, plainly 0 when the mean was 0?

Correct. This is because the daily mean values for storages were very small and very often the storages are plainly zero. We tested the same method using daily median and daily maximum values, but this did not considerably affect the results. However, we decided to use daily maximum values in the updated manuscript to avoid any confusion (see section 3.2.4).



33) Page, 12, L 379: "...storages might be slightly displaced or mistimed". That is typical for NWP verification, but should not be relevant in an evaluation study.

This part has been modified as follows:

*"However, this method might penalize the model more than it should because the modeled storages were compared with observations using day-to-day values. For this reason, we additionally calculated the multi-year sums of all the modeled and observed daily cases with daily maximum more than zero or zero."* (P17 L525–528).

34) Page, 14, L417-419: Second part of this sentence, "however ..." is unclear. Please rephrase.

Rephrased as:

*"However, underestimated frequency of snow cannot be explained by the snowpacks that are depleting too fast in the model. This is because the majority of the stations with an optical sensor utilized in this study are located in the southern parts of Finland where the snowpacks might actually be overestimated rather than underestimated as discussed before."* (P18 L567–570).

35) Conclusions, L 420-423. Like in the abstract it should be stated that HCLIM-ALARO is driven by ERA-Interim re-analyses.

Thank you for pointing this out – this statement is included (P18 L579–580).

36) Conclusions, L 422: "the skill of HCLIM- ..." → "the skill of the HCLIM- ..."  
Corrected (P18 L578).

37) Conclusions, L 427: "undercath" → "undercatch"  
Corrected (P19 L585).

38) Conclusions, L 427-428: "the modeled domain" → "the model domain"  
Changed as "Finland" (P19 L586).

39) Conclusions, L 432-433: Remove "However,". Moreover, the absence of data-assimilation is most probably at least as relevant as the difference in horizontal resolution for explaining the poorer performance.

This sentence is modified as:

*"The coarser grid resolution of the HCLIM38-ALARO compared to the NWP model input used in the earlier studies might be the main reason for this outcome as no data assimilation was used for HCLIM38-ALARO or the NWP model."* (P19 L594–596).

40) Conclusions, L 439: "This is of a great importance" → "This is of great importance"  
Corrected (P19 L603).

41) Conclusions, L 439: "... are the most slippery..." → "... are most prone to slippery conditions ..."  
Corrected (P19 L603).

42) Conclusions, L442: "... than what the observations showed" → "than is indicated by observations"  
Corrected (P19 L606–607).

43) Conclusions, L447: “the 13 year long ... period” → “the 13-year long ... period”.  
Corrected (P19 L611).

44) Figure caption 1: Does the displayed domain include or exclude the boundary relaxation zone? How wide is the zone in terms of grid points? The color “yellow” for Northern Finland is very hard to distinguish.

The extension zone of 11 grid points has been removed from the figure. However, the figure includes an 8-point wide relaxation zone. This information has been added to the figure caption (see Fig. 1). The colors are changed for Fig. 1 and 2, so that yellow color is not used.

The following phrases were added:

*“Figure 1 depicts the HCLIM38-ALARO simulated domain along with the model’s 8-point wide relaxation zone as well as the regions of Finland that are analyzed in more detail in this study.”* (P4 L101–102)

*“The transparent areas depict the model’s 8-point wide relaxation zone.”* (Fig. 1; P26 L826)

## References:

Kotlarski, S., Keuler, K., Christensen, O. B., Colette, A., Déqué, M., Gobiet, A., Goergen, K., Jacob, D., Lüthi, D., van Meijgaard, E., Nikulin, G., Schär, C., Teichmann, C., Vautard, R., Warrach-Sagi, K., and Wulfmeyer, V.: Regional climate modeling on European scales: a joint standard evaluation of the EURO-CORDEX RCM ensemble, *Geosci. Model Dev.*, 7, 1297-1333, <https://doi.org/10.5194/gmd-7-1297-2014>, 2014.

Maraun, D., Shepherd, T., Widmann, M., Zappa, G., Walton, D., and Gutiérrez, J. et al.: Towards process-informed bias correction of climate change simulations, *Nat. Clim. Change*, 7, 764–773, <https://doi.org/10.1038/nclimate3418>, 2017.

Schoetter, R., Hoffmann, P., Rechid, D., and Schlünzen, K.: Evaluation and Bias Correction of Regional Climate Model Results Using Model Evaluation Measures, *J. Appl. Meteorol. Clim.*, 51, 1670–1684, <https://doi.org/10.1175/jamc-d-11-0161.1>, 2012.

Switanek, M. B., Troch, P. A., Castro, C. L., Leuprecht, A., Chang, H.-I., Mukherjee, R., and Demaria, E. M. C.: Scaled distribution mapping: a bias correction method that preserves raw climate model projected changes, *Hydrol. Earth Syst. Sci.*, 21, 2649-2666, <https://doi.org/10.5194/hess-21-2649-2017>, 2017.
